# Supplementary material
Source: Springer Nature journal article supplement (https://www.springermedizin.de/resource/supplementary/12885_2006_761_MOESM2_ESM.pdf/9470254)

**A.**

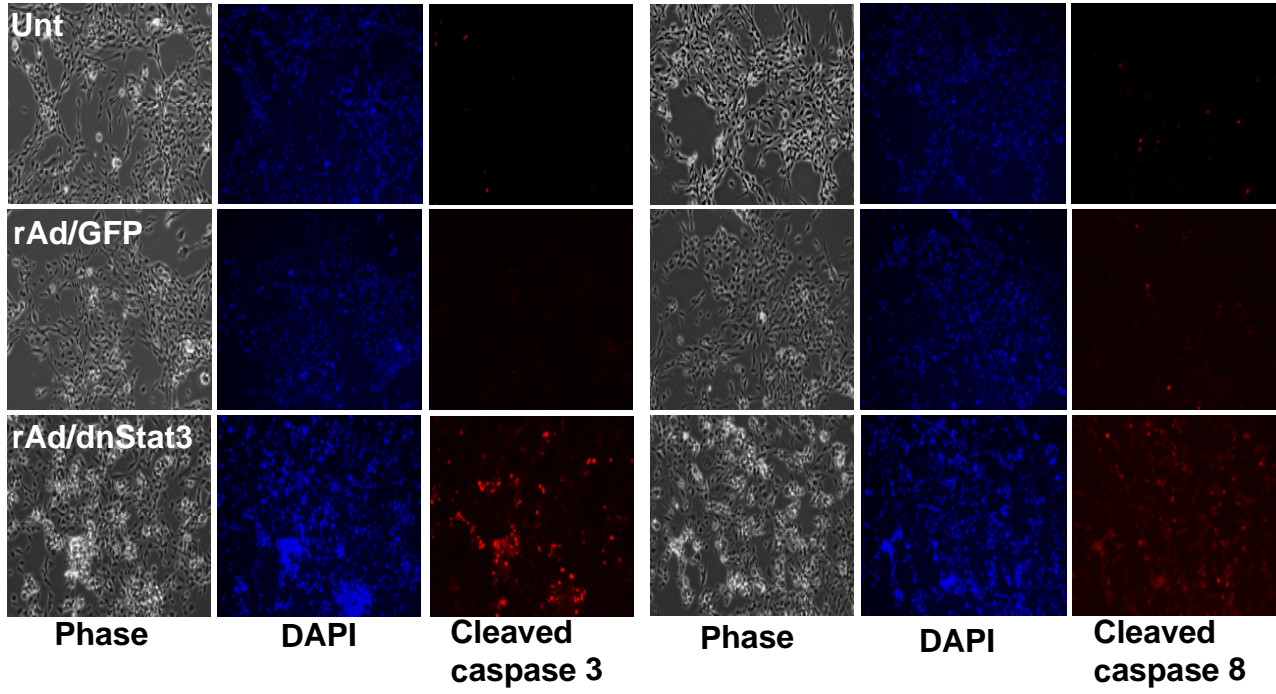

**B.**

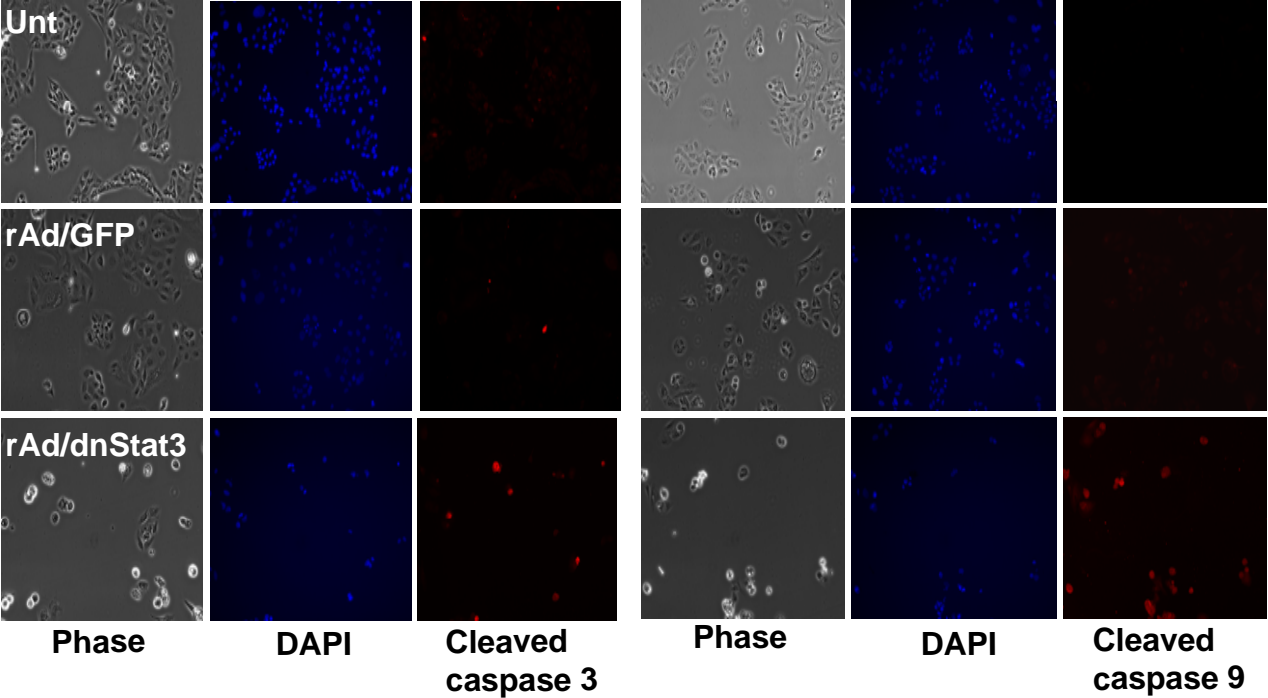

Cleaved caspase positive cells (%)

RD2

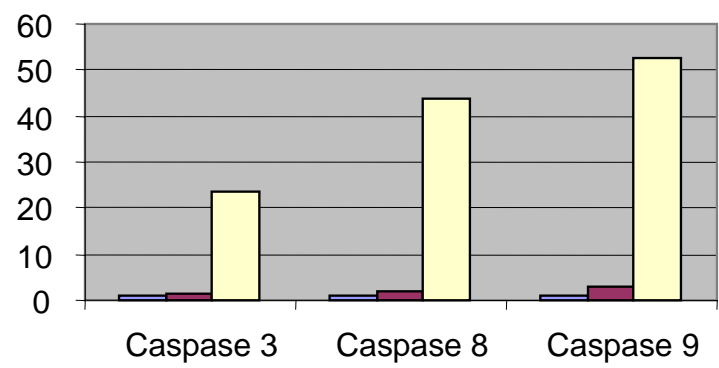

U2OS

Cleaved caspase positive cells (%)

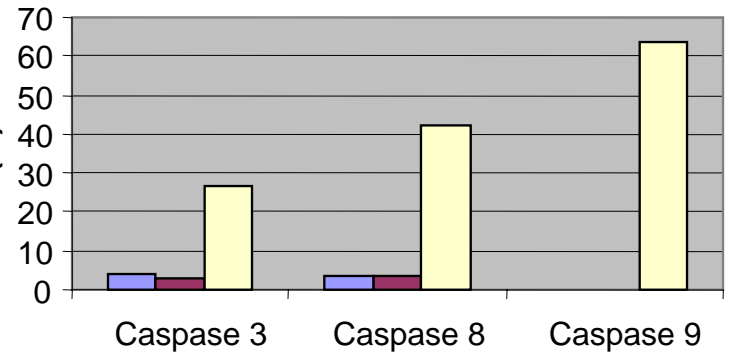

Untransduced      rAd/GFP (400)      rAd/dnStat3 (400)

**D.**

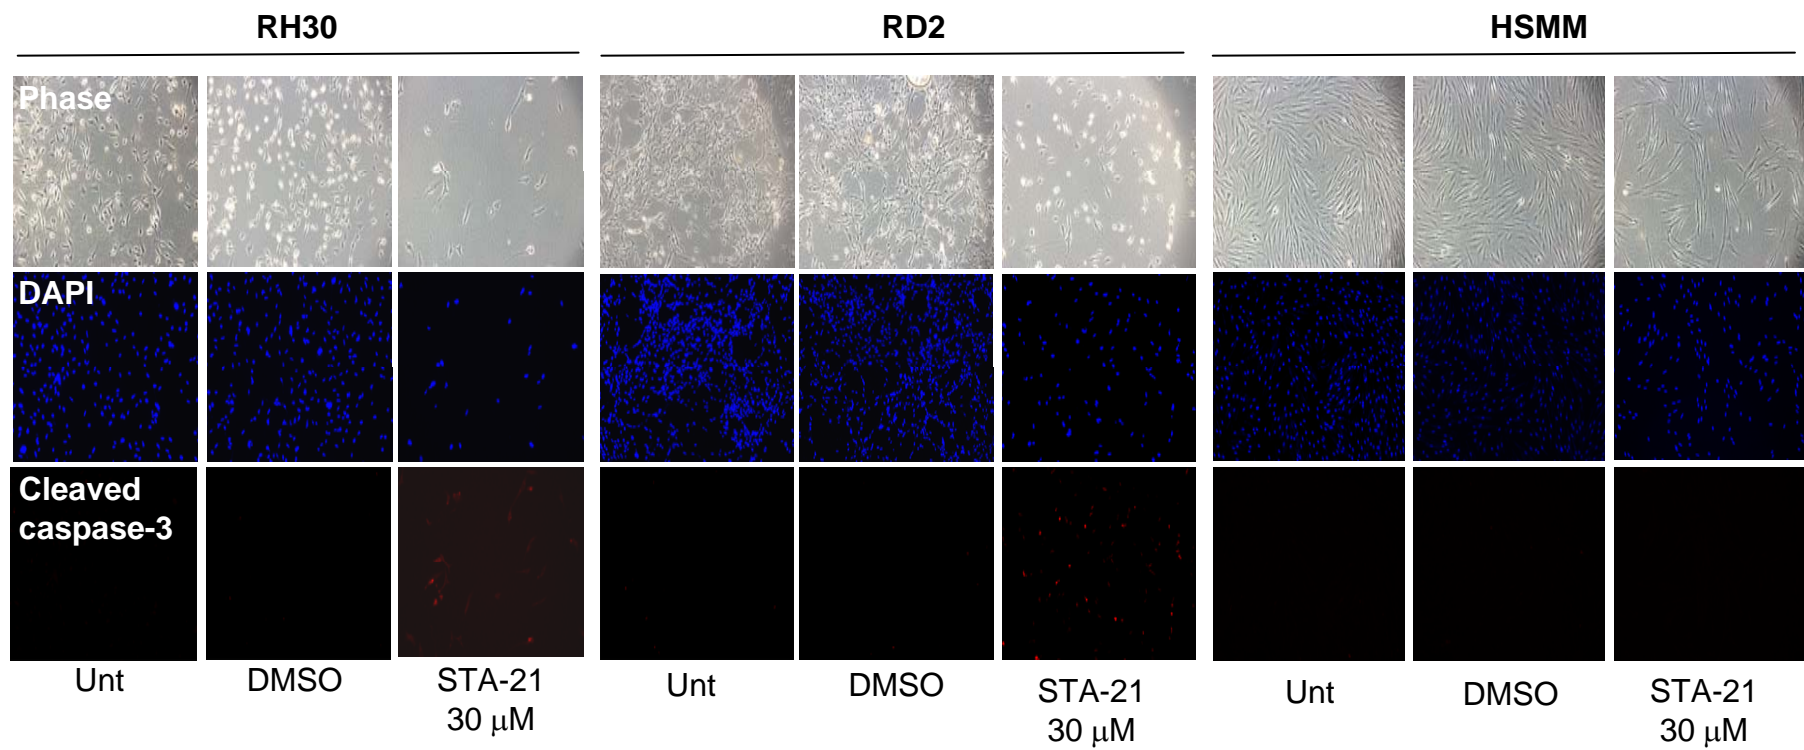

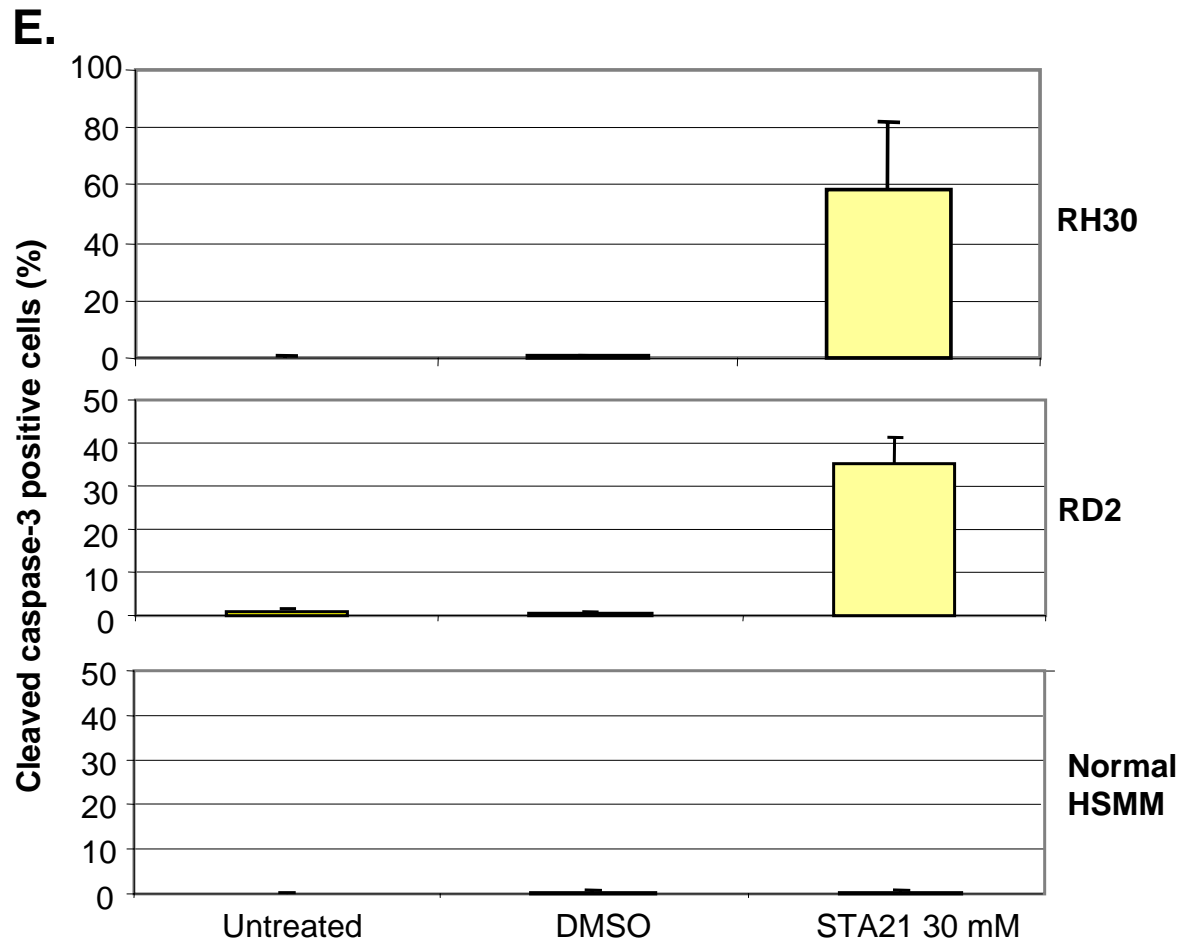

Supplement: MOESM2 [file 9470254]
